# Supplementary material for: Impact of Supported Housing on Social Relationships Among Homeless Veterans
Source: Atypon-hosted journal article supplement (doi:10.1176/appi.ps.201500276), 2016-10-17
Supplement: appi.ps.201500276.ds001.pdf [file appi.ps.201500276.ds001.pdf]

## Description of Measures

Demographic variables included age, gender, race, ethnicity, marital status, years of education, history of homelessness, service connected disability status, method of initial contact with program, and era of active military duty. Clinical characteristics included diagnosis, suicidal ideation and attempts, and composite scores on the Addiction Severity Index (ASI) for drug and alcohol use and expenditures, psychiatric symptoms, legal, and medical issues (1). Community adjustment variables included amount and source of income; employment status; number of days homeless, in an institution, or housed out of the previous 90; recent criminal activity; and quality of life (assessed via the Quality of Life Interview) (2).

*Social Network Size* was assessed by asking participants to indicate the people (up to 8) they felt close to in each of 10 family, peer, or provider relationships. Family included: 1) family of origin (parents, grandparents, and siblings), 2) family of procreation (children and spouse/significant other), and 3) extended family (other family). Peers included other veterans, non-veteran friends, and coworkers. Providers referred to any healthcare provider.

The second measure, *Frequency of Contact*, was assessed by asking participants to indicate, on a Likert scale ranging from 0 ("Never") to 6 ("Lives with me"), the maximum frequency of face-to-face contact over the past year with any person in each of the 10 relationship categories, yielding 10 frequency of contact scores (3, 4). Family, peer, and provider contact indices were then created by multiplying the total network size within each domain by the maximum frequency of contact with any person in that domain. A *Total Contact Index* was also created by multiplying total network size by the maximum frequency of contact with any person in any relationship category.

The third measure, *Perceived Availability of Support*, was assessed using a modified version of the Social Support Resources (SS-R) measure (5). Respondents were provided with a list of 10 relationship categories and asked to indicate, in a yes/no format, whether he/she "could have counted" on anyone within the relationship categories for: tangible support (financial help of a loan of \$100), instrumental support (help with transportation to an appointment), and emotional support (help in an emotional crisis) (6, 7). Amount of tangible, instrumental, and emotional support indicators were created by summing the total number of "yes" responses within each type of support, regardless of relationship category.

The fourth and fifth measures assessed satisfaction with family and non-kin friends using two subscales of the Lehman Quality of Life interview— which rely on a 1-7 terrible to delighted scale (2).

## References

1. McLellan AT, Kushner H, Metzger D, et al.: The fifth edition of the Addiction Severity Index. *Journal of substance abuse treatment* 9:199-213, 1992
2. Lehman AF: A quality of life interview for the chronically mentally ill. *Evaluation and program planning* 11:51-62, 1988
3. Leda C, Rosenheck R: in a Residential Treatment Program for Homeless Veterans. *Am J Psychiatry* 149:1219-24, 1992
4. Leda C, Rosenheck R: Race in the treatment of homeless mentally ill veterans. *The Journal of nervous and mental disease* 183:529-37, 1995
5. Vaux A: Assessment of social support; in *The meaning and measurement of social support*. Edited by Baumann HOFVU. Washington, DC, US: Hemisphere Publishing Corp, 1992
6. Rosenheck R, Seibyl CL: Effectiveness of treatment elements in a residential–work therapy program for veterans with severe substance abuse. *Psychiatric services*, 1997
7. Lam JA, Rosenheck R: Social Support and Service Use Among Homeless Persons With Serious Mental Illness. *International Journal of Social Psychiatry* 45:13-28, 1999

| <b>Table</b>                                      |                     |          |                 |          |                 |          |                      |          |
|---------------------------------------------------|---------------------|----------|-----------------|----------|-----------------|----------|----------------------|----------|
| <b>Baseline Socio-Demographic Characteristics</b> |                     |          |                 |          |                 |          |                      |          |
|                                                   | <b>Total Sample</b> |          | <b>HUD-VASH</b> |          | <b>ICM Only</b> |          | <b>Standard Care</b> |          |
|                                                   | N = 460             |          | N = 182         |          | N = 90          |          | N = 188              |          |
|                                                   | <b>N</b>            | <b>%</b> | <b>N</b>        | <b>%</b> | <b>N</b>        | <b>%</b> | <b>N</b>             | <b>%</b> |
| Age (M ± SD)                                      | 42.5 ± 7.8          |          | 41.6 ± 7.6      |          | 43.1 ± 6.9      |          | 42.9 ± 8.2           |          |
| Male                                              | 438                 | 95       | 174             | 96       | 81*             | 90       | 183                  | 97       |
| <b>Race/Ethnicity</b>                             |                     |          |                 |          |                 |          |                      |          |
| White, not Hispanic                               | 139                 | 30       | 59              | 32       | 24              | 27       | 56                   | 30       |
| Black, not Hispanic                               | 287                 | 63       | 109             | 60       | 58              | 65       | 120                  | 64       |
| Hispanic                                          | 18                  | 4        | 9               | 5        | 1               | 1        | 8                    | 4        |
| Other                                             | 15                  | 3        | 5               | 3        | 6               | 7        | 4                    | 2        |
| <b>Marital Status</b>                             |                     |          |                 |          |                 |          |                      |          |
| Married                                           | 24                  | 5        | 8               | 4        | 4               | 4        | 12                   | 6        |
| Widowed                                           | 9                   | 2        | 4               | 2        | 2               | 2        | 3                    | 2        |
| Separated                                         | 75                  | 16       | 32              | 18       | 17              | 19       | 26                   | 14       |
| Divorced                                          | 194                 | 43       | 69              | 38       | 40              | 44       | 85                   | 46       |
| Never Married                                     | 155                 | 34       | 67              | 37       | 27              | 30       | 61                   | 33       |
| <b>Education and Income</b>                       |                     |          |                 |          |                 |          |                      |          |
| Years of education (M ± SD)                       | 12.7 ± 1.7          |          | 12.7 ± 1.6      |          | 12.8 ± 1.9      |          | 12.7 ± 1.6           |          |
| Total income (M ± SD)                             | \$443 ± \$540       |          | \$431 ± \$449   |          | \$487 ± \$520   |          | \$436 ± \$626        |          |
| <b>Employment</b>                                 |                     |          |                 |          |                 |          |                      |          |
| # days worked for pay in last 30 (M ± SD)         | 3.5 ± 7.4           |          | 3.6 ± 7.6       |          | 3.8 ± 7.6       |          | 3.2 ± 7.2            |          |
| <b>Living Situation</b>                           |                     |          |                 |          |                 |          |                      |          |
| # days homeless/past 90 (M ± SD)                  | 30.7 ± 32.1         |          | 31.9 ± 32.2     |          | 32.6 ± 32.1     |          | 28.6 ± 31.9          |          |
| # days in institution/ past 90 (M ± SD)           | 54.6 ± 34.0         |          | 53.7 ± 32.7     |          | 49.4 ± 36.9     |          | 58.0 ± 33.7          |          |
| # of days housed/past 90 (M ± SD)                 | 4.6 ± 13.4          |          | 4.4 ± 12.9      |          | 7.9 ± 19.2      |          | 3.3 ± 9.9            |          |
| <b>Psychiatric Diagnosis</b>                      |                     |          |                 |          |                 |          |                      |          |
| Schizophrenia                                     | 27                  | 6        | 13              | 7        | 7               | 8        | 7                    | 4        |
| Other psychiatric disorder                        | 19                  | 4        | 9               | 5        | 3               | 3        | 7                    | 4        |
| Mood disorder                                     | 140                 | 31       | 46              | 26       | 31              | 34       | 63                   | 34       |
| PTSD from combat                                  | 67                  | 15       | 23              | 13       | 16              | 18       | 28                   | 15       |

| <b>Table</b>                                                |                     |          |                 |          |                 |          |                      |          |
|-------------------------------------------------------------|---------------------|----------|-----------------|----------|-----------------|----------|----------------------|----------|
| <b>Baseline Socio-Demographic Characteristics</b>           |                     |          |                 |          |                 |          |                      |          |
|                                                             | <b>Total Sample</b> |          | <b>HUD-VASH</b> |          | <b>ICM Only</b> |          | <b>Standard Care</b> |          |
|                                                             | N = 460             |          | N = 182         |          | N = 90          |          | N = 188              |          |
|                                                             | <b>N</b>            | <b>%</b> | <b>N</b>        | <b>%</b> | <b>N</b>        | <b>%</b> | <b>N</b>             | <b>%</b> |
| Alcohol abuse/dependency                                    | 323                 | 71       | 121             | 67       | 63              | 70       | 139                  | 74       |
| Drug abuse/dependency                                       | 301                 | 66       | 115             | 64       | 57              | 63       | 129                  | 69       |
| Serious thoughts of suicide (past 30 days)                  | 41                  | 9        | 14              | 8        | 7               | 8        | 20                   | 11       |
| Suicide attempt (past 30 days)                              | 2                   | .4       | 2               | 1        | 0               | 0        | 0                    | 0        |
| <b>Alcohol and Drug Use</b>                                 |                     |          |                 |          |                 |          |                      |          |
| # of days intoxicated/past 30 (M ± SD)                      | 5.4 ± 9.9           |          | 5.0 ± 9.4       |          | 5.0 ± 9.9       |          | 5.9 ± 10.4           |          |
| # of days of drug use/past 30 (M ± SD)                      | 5.6 ± 9.8           |          | 5.2 ± 9.4       |          | 5.5 ± 9.8       |          | 6.1 ± 10.2           |          |
| Substance abuse expenditures/past 30 days (M ± SD)          | \$239 ± \$537       |          | \$202 ± \$364   |          | \$266 ± \$631   |          | \$262 ± \$622        |          |
| % income spent on substances/past 30 days (M ± SD)          | 31% ± 41%           |          | 32% ± 41%       |          | 26% ± 39%       |          | 31% ± 42%            |          |
| <b>Medical, Legal, and Quality of Life</b>                  |                     |          |                 |          |                 |          |                      |          |
| Quality of Life- Overall satisfaction (M ± SD) <sup>1</sup> | 3.9 ± 1.5           |          | 4.0 ± 1.6       |          | 3.7 ± 1.5       |          | 4.0 ± 1.5            |          |

\* p<.05

<sup>1</sup> Possible scores range from 0 to 7, with higher scores indicating greater overall satisfaction with life.

| <b>Table</b>                                         |                     |    |                 |    |                 |    |                      |    |
|------------------------------------------------------|---------------------|----|-----------------|----|-----------------|----|----------------------|----|
| <b>Baseline Social Network Characteristics</b>       |                     |    |                 |    |                 |    |                      |    |
|                                                      | <b>Total Sample</b> |    | <b>HUD-VASH</b> |    | <b>ICM Only</b> |    | <b>Standard Care</b> |    |
|                                                      | N = 460             |    | N = 182         |    | N = 90          |    | N = 188              |    |
|                                                      | N                   | %  | N               | %  | N               | %  | N                    | %  |
| <b>Total Network Size<sup>1</sup> (M ± SD)</b>       | 10.3 ± 9.0          |    | 10.7 ± 9.1      |    | 10.1 ± 8.4      |    | 10.0 ± 9.2           |    |
| <i>Family</i>                                        |                     |    |                 |    |                 |    |                      |    |
| Any close family members                             | 375                 | 82 | 149             | 82 | 77              | 86 | 149                  | 79 |
| Number of close family members <sup>2</sup> (M ± SD) | 5.7 ± 5.6           |    | 6.1 ± 5.8       |    | 5.8 ± 5.6       |    | 5.3 ± 5.3            |    |
| Family of origin (M ± SD)                            | 2.4 ± 2.6           |    | 2.7 ± 2.8       |    | 2.1 ± 2.4       |    | 2.3 ± 2.5            |    |
| Family of procreation (M ± SD)                       | 1.6 ± 2.0           |    | 1.7 ± 2.1       |    | 1.9 ± 2.0       |    | 1.5 ± 1.9            |    |
| Extended/Other family (M ± SD)                       | 1.6 ± 2.7           |    | 1.7 ± 2.8       |    | 1.8 ± 2.8       |    | 1.5 ± 2.6            |    |
| <i>Peers</i>                                         |                     |    |                 |    |                 |    |                      |    |
| Any close peers                                      | 309                 | 67 | 128             | 70 | 62              | 69 | 119                  | 63 |
| Number of close peers <sup>3</sup> (M ± SD)          | 3.6 ± 4.5           |    | 3.7 ± 4.4       |    | 3.3 ± 4.4       |    | 3.5 ± 4.6            |    |
| Veterans (M ± SD)                                    | 1.4 ± 2.3           |    | 1.5 ± 2.4       |    | 1.4 ± 2.1       |    | 1.4 ± 2.2            |    |
| Non-veteran friends (M ± SD)                         | 1.8 ± 2.5           |    | 1.9 ± 2.6       |    | 1.7 ± 2.5       |    | 1.7 ± 2.4            |    |
| Co-workers other than friends and veterans (M ± SD)  | .3 ± 1.2            |    | .3 ± 1.1        |    | .2 ± .8         |    | .4 ± 1.4             |    |
| <i>Providers</i>                                     |                     |    |                 |    |                 |    |                      |    |
| Any close providers                                  | 180                 | 39 | 70              | 39 | 36              | 40 | 74                   | 39 |
| Number of close providers <sup>4</sup> (M ± SD)      | 1.0 ± 1.8           |    | .9 ± 1.6        |    | 1.0 ± 1.6       |    | 1.2 ± 2.1            |    |
| <b>Frequency of Contact</b>                          |                     |    |                 |    |                 |    |                      |    |
| Total contact index <sup>5</sup> (M ± SD)            | 27.8 ± 30.3         |    | 29.8 ± 232.1    |    | 25.4 ± 25.8     |    | 27.1 ± 30.5          |    |
| Family contact index (M ± SD)                        | 13.3 ± 17.4         |    | 14.3 ± 18.2     |    | 12.7 ± 15.4     |    | 12.8 ± 17.5          |    |
| Peer contact index (M ± SD)                          | 11.7 ± 17.8         |    | 12.8 ± 19.3     |    | 9.9 ± 16.6      |    | 11.4 ± 16.8          |    |
| Provider contact index (M ± SD)                      | 2.8 ± 6.0           |    | 2.7 ± 6.0       |    | 2.8 ± 5.2       |    | 2.9 ± 6.5            |    |
| <b>Amount of Support</b>                             |                     |    |                 |    |                 |    |                      |    |
| Total Support Index <sup>6</sup> (M ± SD)            | 6.8 ± 4.8           |    | 6.9 ± 4.5       |    | 7.0 ± 5.4       |    | 6.6 ± 4.7            |    |
| Tangible Support (M ± SD)                            | 1.4 ± 1.6           |    | 1.4 ± 1.5       |    | 1.4 ± 1.8       |    | 1.4 ± 1.7            |    |
| Instrumental Support (M ± SD)                        | 2.1 ± 1.7           |    | 2.2 ± 1.7       |    | 2.2 ± 1.9       |    | 2.0 ± 1.6            |    |
| Emotional Support (M ± SD)                           | 3.3 ± 2.3           |    | 3.3 ± 2.3       |    | 3.3 ± 2.4       |    | 3.2 ± 2.4            |    |
| <i>By Source of support<sup>7</sup></i>              |                     |    |                 |    |                 |    |                      |    |
| Family Members (M ± SD)                              | 2.8 ± 3.0           |    | 2.8 ± 2.8       |    | 2.9 ± 3.5       |    | 2.6 ± 2.9            |    |
| Peers (M ± SD)                                       | 1.7 ± 1.8           |    | 1.9 ± 1.7       |    | 1.7 ± 1.9       |    | 1.6 ± 1.7            |    |
| Providers (M ± SD)                                   | 1.3 ± 1.3           |    | 1.3 ± 1.4       |    | 1.3 ± 1.3       |    | 1.3 ± 1.3            |    |
| Others (M ± SD)                                      | 1.0 ± 1.0           |    | .0 ± 1.0        |    | 1.0 ± .9        |    | 1.0 ± 1.0            |    |

| Table                                        |              |   |           |   |           |   |               |   |
|----------------------------------------------|--------------|---|-----------|---|-----------|---|---------------|---|
| Baseline Social Network Characteristics      |              |   |           |   |           |   |               |   |
|                                              | Total Sample |   | HUD-VASH  |   | ICM Only  |   | Standard Care |   |
|                                              | N = 460      |   | N = 182   |   | N = 90    |   | N = 188       |   |
|                                              | N            | % | N         | % | N         | % | N             | % |
| <b>Satisfaction with Support<sup>8</sup></b> |              |   |           |   |           |   |               |   |
| QOL-Social (M ± SD)                          | 3.6 ± 1.3    |   | 3.6 ± 1.3 |   | 3.6 ± 1.1 |   | 3.5 ± 1.3     |   |
| QOL-Family (M ± SD)                          | 4.0 ± 1.6    |   | 4.2 ± 1.6 |   | 3.8 ± 1.6 |   | 4.0 ± 1.5     |   |

<sup>1</sup>Total Social network size was determined by the number of people the respondent considered “close” in 10 different relationship categories. The maximum number allowed per category was 8, such that possible scores on Total Network Size could range from 0 to 80, with higher numbers indicating a greater number of close network members identified.

<sup>2</sup>Number of close family members was determined by the number of people the respondent considered “close” in 6 different family relationship categories (possible scores range from 0 to 64): family of origin (parents, grandparents, and siblings, possible scores ranging from 0 to 24), 2) family of procreation (children and spouse/significant other, possible scores ranging from 0 to 16), and 3) extended family (other family, possible scores ranging from 0 to 8). Higher numbers in each category indicates a greater number of close network members identified.

<sup>3</sup>Number of close peers was determined by the number of people the respondent considered “close” in 3 different peer relationship categories (possible scores ranging from 0 to 24): other veterans, non-veteran friends, and coworkers. In each peer category, the total possible scores range from 0 to 8. Higher numbers in each category indicates a greater number of close peer network members identified.

<sup>4</sup>Possible scores range from 0 to 8, with higher numbers indicating a greater number of close providers identified.

<sup>5</sup>Contact indices are determined by the number of persons in each category x maximum frequency of contact with any individual in the category. Frequency of contact was assessed by a 0 to 6 Likert scale with higher scores indicating more frequent contact. Possible scores for contact indices range from 0 to 480 for total contact index, 0 to 384 for family contact index, 0 to 144 for peer contact index, and 0 to 48 for provider contact index. Higher scores indicate a greater amount of contact with close network members.

<sup>6</sup>Total support index was determined by the sum of the number of relationship categories that were perceived as available sources of tangible (i.e., a small loan), instrumental (i.e., a ride), and emotional support (i.e., someone to talk to if feeling depressed or suicidal). Possible scores range from 0 to 10 for each category. Total scores range from 0 to 30, with higher scores indicating greater availability of sources for multiple types of support.

<sup>7</sup>Amount of support by source of support was determined by the number of specific relationship categories identified within each domain as providing tangible, instrumental, or emotional support. Possible scores for each relationship group range from 0 to 15 for family members, 0 to 9 for peers, 0 to 3 for providers, and 0 to 6 for others, with higher scores indicating a greater number of specific relationships providing tangible, instrumental, and emotional support

<sup>8</sup>Total scores for each subscale range from 0 to 7, with higher scores indicating greater satisfaction with social and family relationships.

| <b>Table</b>                                 |                 |           |                 |           |                  |           |                  |           |          |
|----------------------------------------------|-----------------|-----------|-----------------|-----------|------------------|-----------|------------------|-----------|----------|
| <b>Main Effects for Time</b>                 |                 |           |                 |           |                  |           |                  |           |          |
|                                              | <b>Baseline</b> |           | <b>6 Months</b> |           | <b>12 Months</b> |           | <b>18 Months</b> |           |          |
|                                              | <b>Mean</b>     | <b>SE</b> | <b>Mean</b>     | <b>SE</b> | <b>Mean</b>      | <b>SE</b> | <b>Mean</b>      | <b>SE</b> | <b>p</b> |
| <b>Total Network Size<sup>1</sup></b>        | 10.2            | .3        | 11.8            | .4        | 12.3             | .4        | 12.7             | .4        | <.001    |
| <i>Family</i>                                |                 |           |                 |           |                  |           |                  |           |          |
| Number of close family members <sup>2</sup>  | 5.6             | .2        | 5.4             | .2        | 5.6              | .2        | 5.8              | .2        | <.001    |
| Family of origin                             | 2.4             | .1        | 2.3             | .1        | 2.4              | .1        | 2.5              | .1        | <.001    |
| Family of procreation                        | 1.6             | .1        | 1.6             | .1        | 1.6              | .1        | 1.7              | .1        | <.001    |
| Extended/other family                        | 1.6             | .1        | 1.5             | .1        | 1.5              | .1        | 1.6              | .1        | <.001    |
| <i>Peers</i>                                 |                 |           |                 |           |                  |           |                  |           |          |
| Number of close peers <sup>3</sup>           | 3.5             | .2        | 4.7             | .2        | 5.1              | .2        | 5.3              | .2        | <.001    |
| Veterans                                     | 1.4             | .1        | 2.2             | .1        | 2.2              | .1        | 2.3              | .1        | <.001    |
| Non-veteran friends                          | 1.8             | .1        | 2.0             | .1        | 2.1              | .1        | 2.3              | .1        | <.001    |
| Co-workers other than friends and veterans   | 0.3             | .1        | 0.6             | .1        | 0.8              | .1        | 0.7              | .1        | <.001    |
| <i>Providers</i>                             |                 |           |                 |           |                  |           |                  |           |          |
| Number of close providers <sup>4</sup>       | 1.1             | .1        | 1.7             | .1        | 1.7              | .1        | 1.6              | .1        | <.001    |
| <b>Frequency of Contact</b>                  |                 |           |                 |           |                  |           |                  |           |          |
| Total contact index <sup>5</sup>             | 27.1            | 1.4       | 38.6            | 1.6       | 40.8             | 1.5       | 41.1             | 1.6       | <.001    |
| Family contact index                         | 12.9            | .6        | 14.2            | .7        | 15.0             | .7        | 15.5             | .7        | <.001    |
| Peer contact index                           | 11.3            | .9        | 18.5            | 1.0       | 19.8             | 1.0       | 20.3             | 1.0       | <.001    |
| Provider contact index                       | 2.9             | .3        | 6.0             | .4        | 6.0              | .4        | 5.3              | .4        | <.001    |
| <b>Amount of Support</b>                     |                 |           |                 |           |                  |           |                  |           |          |
| Total Support Index <sup>6</sup>             |                 |           |                 |           |                  |           |                  |           |          |
| Tangible support                             | 1.4             | .1        | 2.0             | .1        | 1.9              | .1        | 2.0              | .1        | <.001    |
| Instrumental support                         | 2.1             | .1        | 2.2             | .1        | 2.2              | .1        | 2.2              | .1        | <.001    |
| Emotional support                            | 3.2             | .1        | 3.4             | .1        | 3.4              | .1        | 3.3              | .1        | <.001    |
| <b>Satisfaction with Support<sup>7</sup></b> |                 |           |                 |           |                  |           |                  |           |          |
| QOL-Social                                   | 3.6             | .0        | 4.3             | .1        | 4.3              | .1        | 4.3              | .1        | <.001    |
| QOL-Family                                   | 4.0             | .1        | 4.3             | .1        | 4.3              | .1        | 4.5              | .1        | <.001    |

<sup>1</sup>Total Social network size was determined by the number of people the respondent considered “close” in 10 different relationship categories. The maximum number allowed per category was 8, such that possible scores on Total Network Size could range from 0 to 80, with higher numbers indicating a greater number of close network members identified.

<sup>2</sup>Number of close family members was determined by the number of people the respondent considered “close” in 6 different family relationship categories (possible scores range from 0 to 64): family of origin (parents, grandparents, and siblings, possible scores ranging from 0 to 24), 2) family of procreation (children and spouse/significant other, possible scores ranging from 0 to 16), and 3) extended family

(other family, possible scores ranging from 0 to 8). Higher numbers in each category indicates a greater number of close network members identified.

<sup>3</sup> Number of close peers was determined by the number of people the respondent considered “close” in 3 different peer relationship categories (possible scores ranging from 0 to 24): other veterans, non-veteran friends, and coworkers. In each peer category, the total possible scores range from 0 to 8. Higher numbers in each category indicates a greater number of close peer network members identified.

<sup>4</sup> Possible scores range from 0 to 8, with higher numbers indicating a greater number of close providers identified.

<sup>5</sup> Contact indices are determined by the number of persons in each category x maximum frequency of contact with any individual in the category. Frequency of contact was assessed by a 0 to 6 Likert scale with higher scores indicating more frequent contact. Possible scores for contact indices range from 0 to 480 for Total Contact Index, 0 to 384 for Family Contact Index, 0 to 144 for Peer Contact Index, and 0 to 48 for Provider Contact Index. Higher scores indicate a greater amount of contact with close network members.

<sup>6</sup> Total Support Index was determined by the sum of the number of relationship categories that were perceived as available sources of tangible (i.e., a small loan), instrumental (i.e., a ride), and emotional support (i.e., someone to talk to if feeling depressed or suicidal). Possible scores range from 0 to 10 for each category. Total scores range from 0 to 30, with higher scores indicating greater availability of sources for multiple types of support.

<sup>7</sup> Total scores for each subscale range from 0 to 7, with higher scores indicating greater satisfaction with social and family relationships.
